# Supplementary material
Source: MDPI journal article supplement (https://www.mdpi.com/2073-4344/10/3/293)
Supplement: s1 [file s1]

## Supplementary Information

# $K_2Fe_4O_7$ as heterogeneous photo-Fenton catalyst for highly efficient degradation of dyes

Xinghui Zhang<sup>1</sup>, Zhibin Geng<sup>1</sup>, Juan Jian<sup>2</sup>, Yiqiang He<sup>1</sup>, Zipeng Lv<sup>1</sup>, Xinxin Liu<sup>3</sup> and Hongming Yuan<sup>1,\*</sup>

<sup>1</sup> State Key Laboratory of Inorganic Synthesis and Preparative Chemistry, College of Chemistry, Jilin University, Changchun 130012, P. R. China, 1136900100@qq.com (X.H.Z.); gengzb14@mails.jlu.edu.cn (Z.B.G.); 2496372832@qq.com (Y.Q.H.); 2711596344@qq.com (Z.P.L.).

<sup>2</sup> Key Laboratory of Preparation and Applications of Environmental Friendly Material of the Ministry of Education, College of Chemistry, Jilin Normal University, Changchun 130103, P. R. China, 1814410718@qq.com (J.J.).

<sup>3</sup> Institute of Catalysis for Energy and Environment, College of Chemistry and Chemical Engineering, Shenyang Normal University, Shenyang 110034, P. R. China, liuxinxin1114@163.com (X.X.L.).

\* Correspondence: State Key Laboratory of Inorganic Synthesis and Preparative Chemistry, College of Chemistry, Jilin University, Changchun 130012, P. R. China, hmyuan@jlu.edu.cn.

### **The preparation method of KFO-80 $\mu\text{m}$**

Firstly, added 4 g ferric nitrate into 32 ml deionized water to form a clarifying solution, 55 g potassium hydroxide was slowly added into ferric nitrate solution with stirring continuously until to become light brown. The mixture was directly added into a Teflon-lined stainless steel autoclave and heated at 180 °C for 3 hours. After cooling down to room temperature, the precipitation was washed with deionized water for ten times until its pH be neutralized and then dried overnight in a vacuum drying oven at 60 °C.

### **The synthesis method of KFO-180 $\mu\text{m}$**

Firstly, added 4 g ferric nitrate into 32 ml deionized water to form a clarifying solution, 64 g potassium hydroxide was slowly added into ferric nitrate solution with stirring continuously until to become dark brown. The mixture was directly added into a Teflon-lined stainless steel autoclave and heated at 240 °C for 2 days. After cooling down to room temperature, the precipitation was washed with deionized water for ten times until its pH be neutralized and then dried overnight in a vacuum drying oven at 60 °C.

### **Reusability and stability performance**

After the completion of the photo-Fenton reaction, the suspension was removed from the reaction vessel and washed repeatedly with deionized water and centrifuged. The obtained solid material was dried overnight at 60 °C in a vacuum drying oven. Four consecutive experiments were tested in 100 mL 0.02 g/L MB solution with 0.03 g  $\text{K}_2\text{Fe}_4\text{O}_7$  and 1ml  $\text{H}_2\text{O}_2$  under visible light irradiation for 35 minutes.

### **Supplementary Pictures**

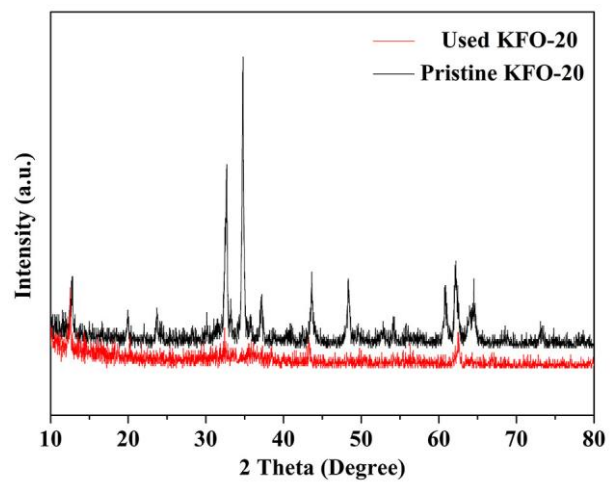

**Figure S1.** The powder XRD pattern for KFO-20 after used four cycles.
